# Supplementary material for: Insights into oxygen transport and net community production in sea ice from oxygen, nitrogen and argon concentrations
Source: Copernicus journal article supplement (doi:10.5194/bg-11-5007-2014), 2014-09-18
Supplement: Supplementary file 1 [file bg-11-5007-2014-supplement.pdf]

Supplement of Biogeosciences, 11, 5007–5020, 2014  
<http://www.biogeosciences.net/11/5007/2014/>  
doi:10.5194/bg-11-5007-2014-supplement  
© Author(s) 2014. CC Attribution 3.0 License.

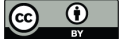

*Supplement of*

## **Insights into oxygen transport and net community production in sea ice from oxygen, nitrogen and argon concentrations**

**J. Zhou et al.**

*Correspondence to:* J. Zhou (jiayzhou@ulb.ac.be)

## 1 **Supplementary material S1**

### 2 *Estimate of bias on O<sub>2</sub> concentrations due to diel O<sub>2</sub> production/respiration*

3 Since the ice cores were not always sampled at the same time of the day, but between 11AM  
4 and 3PM, we estimated the potential bias on the measured O<sub>2</sub> concentrations as following:  
5 According to the incubation experiments of Mar Fernández Méndez ([https://www.mpi-  
6 bremen.de/Binaries/Binary16430/M.Sc.\\_Thesis\\_Mar\\_Fern%C3%A1ndez.pdf](https://www.mpi-bremen.de/Binaries/Binary16430/M.Sc._Thesis_Mar_Fern%C3%A1ndez.pdf), p.27), the net  
7 primary production (NPP) of *F. cylindrus* (a typical cold-water species that can be found in  
8 Arctic and Antarctic seawater and sea ice) was  $1.73 \mu\text{mol O}_2 \text{ L}_{\text{incubation water}}^{-1} \text{ h}^{-1}$ . Assuming a  
9 12 hours of daylight, we may expect a NPP of  $20.76 \mu\text{mol O}_2 \text{ L}_{\text{brine}}^{-1} \text{ d}^{-1}$  in the field. Because  
10 brine volume fraction approach 20 % in the bottom of the ice where the highest chlorophyll-a  
11 concentrations was observed (Figure 3), we may expect a NPP of  $20.76 * 20 \% \mu\text{mol O}_2 \text{ L}_{\text{ice}}^{-1}$   
12  $\text{d}^{-1}$ , hence  $4.15 \mu\text{mol O}_2 \text{ L}_{\text{ice}}^{-1} \text{ d}^{-1}$ . This accounts for 3 to 6 % of the mean O<sub>2</sub> concentrations in  
13 bulk ice (ranging from 67.4 to 122.4  $\mu\text{mol O}_2 \text{ L}_{\text{ice}}^{-1}$ ).

14

# 1 Supplementary material S2

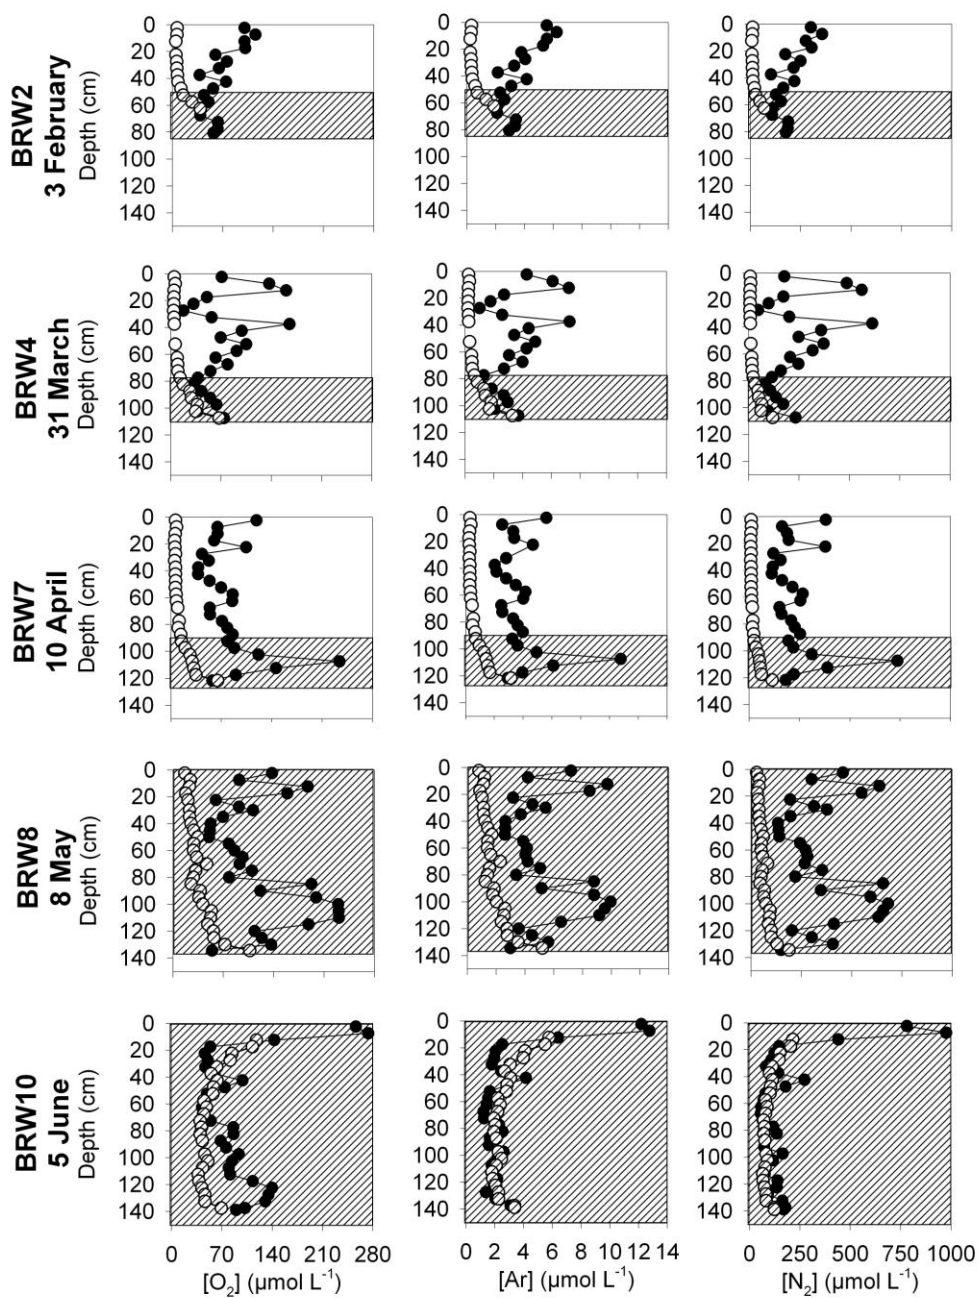

● Gas concentration in bulk ice  
○ Gas solubility in bulk ice

- 2
- 3 Gas concentrations in bulk ice (black dots) compared to their solubility in ice (white dots).
- 4 From left to right, O<sub>2</sub>, Ar and N<sub>2</sub> concentrations. The dashed areas refer to ice layers with
- 5 brine volume fraction above 5 %.
